# Supplementary material
Source: PubMed Central journal article supplement (PMC3908926)
Supplement: NIHMS522426-supplement-1_si_001.pdf [file NIHMS522426-supplement-1_si_001.pdf]

1 Extraction and Quantification of Carbon Nanotubes in Biological Matrices with Application to  
2 Rat Lung Tissue

3

4 Kyle Doudrick<sup>1\*</sup>, Nancy Corson<sup>2</sup>, Günter Oberdörster<sup>2</sup>, Alison C. Eder<sup>2</sup>, Pierre Herckes<sup>3</sup>, Rolf U.  
5 Halden<sup>1,4</sup>, Paul Westerhoff<sup>1</sup>

6

7 <sup>1</sup>Arizona State University, School of Sustainable Engineering and the Built Environment,  
8 Tempe, AZ 85287-5306

9 <sup>2</sup>University of Rochester, School of Medicine and Dentistry, Department of Environmental  
10 Medicine, Rochester, NY 14642

11 <sup>3</sup>Arizona State University, Department of Chemistry and Biochemistry, Tempe, AZ 85287-1604

12 <sup>4</sup>Arizona State University, Biodesign Institute, Security and Defense Systems Initiative, Center  
13 for Environmental Security, Tempe, AZ 85287-5904

14

15 **\*Corresponding Author** – Email: [doudrick@asu.edu](mailto:doudrick@asu.edu)

16

17

18 Journal: *ACS Nano*

19

20 Revision Date: August 30<sup>th</sup> 2013

21

22 Keywords: Carbon nanotube, rat lung, extraction, digestion

23

24 **SUPPORTING INFORMATION**

25 Figure SI-1 shows a sample temperature program for 90% He/10% O<sub>2</sub> conditions for  
26 quantifying CNTs using PTA. The number of temperature steps and the residence time can be  
27 manipulated to better suit the analysis requirements. For example, for S-CNT quantification, the  
28 residence time for the final temperature step (910°C) should be extended to ensure full evolution  
29 of S-CNTs.

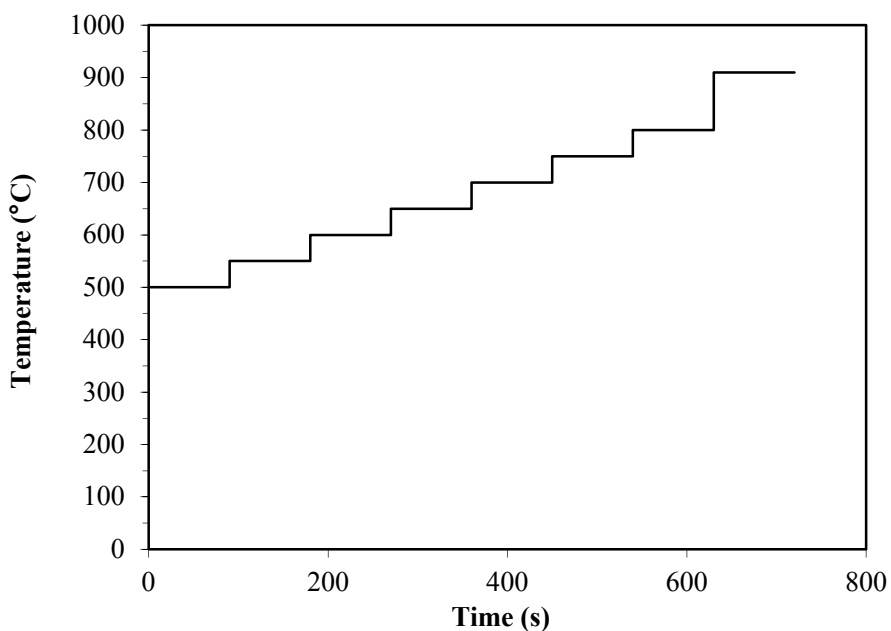

30  
31 Figure SI-1. PTA program for evaluating CNTs under 90% He/10% O<sub>2</sub>.

32  
33 Figure SI-2 shows an example photograph of CNTs sticking to the sidewall of the plastic  
34 micro centrifuge vial after treatment with problematic reagents such as H<sub>2</sub>O<sub>2</sub> and HCl. Side wall  
35 sticking was observed for both conical and round-bottom centrifuge vials.

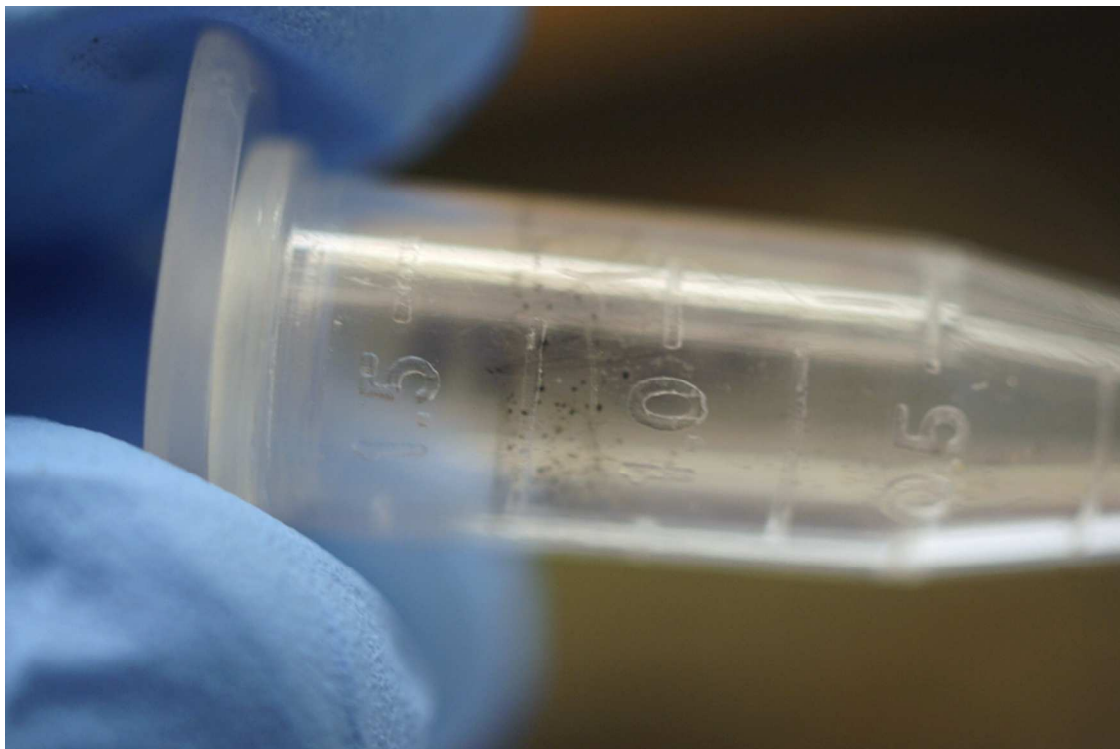

36

37 Figure SI-2. Photograph showing an example of CNTs sticking to the sidewall of a plastic  
38 centrifuge vial after treatment with a problematic reagent (*e.g.*, H<sub>2</sub>O<sub>2</sub>, HCl).

39

40 Figure SI-3 shows a photograph of functionalized W-CNTs centrifuged to a pellet after  
41 treatment with Solvable. The compact pellet formation indicates the ability of Solvable to allow  
42 for agglomeration of stable CNTs, which is similar behavior to non-functionalized CNTs.

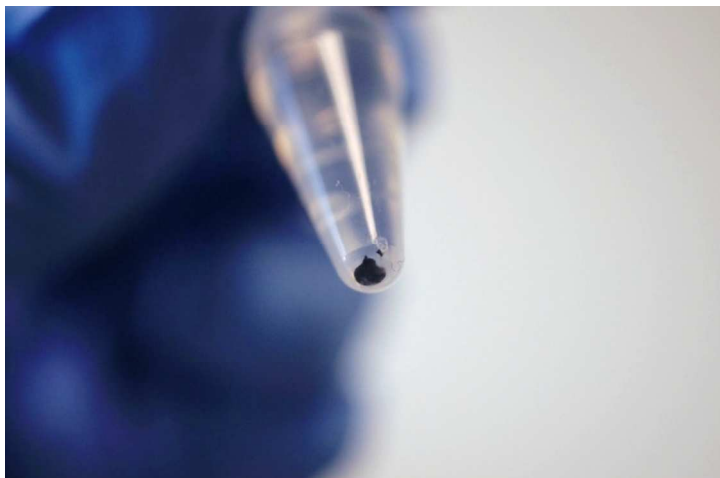

43

44 Figure SI-3. Photograph showing functionalized W-CNT pellet following treatment with  
45 Solvable and centrifugation.

46

47 Figure SI-4 shows the PTA thermograms for S-CNTs and W-CNTs after being treated  
48 with different reagents (PTA oxidizing conditions, 90% He/10% O<sub>2</sub>). The numbers above each  
49 peak (1 through 8) represent a temperature step. To evaluate the thermograms, these peaks were  
50 normalized to the total thermogram area to get a peak fraction. This peak fraction indicates  
51 which peak had the greatest CNT evolution, which can be used to evaluate the thermal stability  
52 of the CNT. For quantification purposes, the FID signal (y-axis) is converted to carbon mass (μg)  
53 using an internal standard (methane).

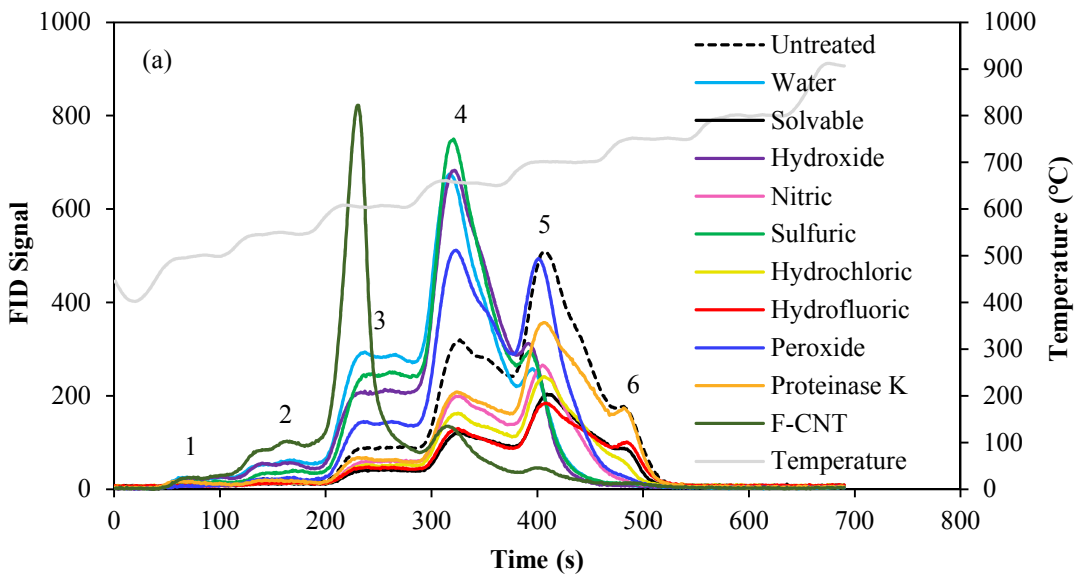

54

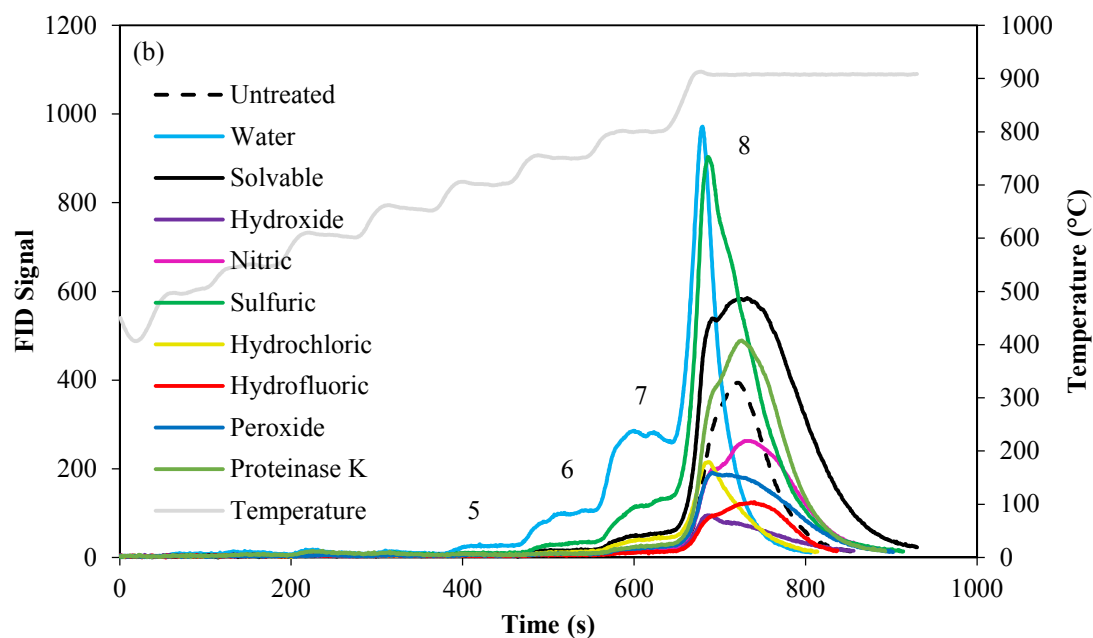

55  
 56 Figure SI-4. Thermograms for (a) W-CNTs and (b) S-CNTs after treatment with the chemical  
 57 digestion reagents. Numbers (1–8) above the FID signal correspond to peak numbers as defined  
 58 by the temperature steps. FID corresponds to mass of carbon evolved.

59
